# Supplementary material for: A boron-interstitial doped C2N layer as a metal-free electrocatalyst for N2 fixation: a computational study
Source: Royal Society of Chemistry journal article supplement (doi:10.1039/c8ta10497b), 2019-01-01
Supplement: c8ta10497b1.pdf [file c8ta10497b1.pdf]

## Supporting Information

### **Boron-Interstitial Doped C<sub>2</sub>N Layer as a Metal-Free Electrocatalyst for N<sub>2</sub>**

#### **Fixation: A Computational Study**

Shuang Ji,<sup>†</sup> Zhongxu Wang,<sup>†</sup> Jingxiang Zhao,<sup>\*,†</sup>

<sup>†</sup> College of Chemistry and Chemical Engineering, and Key Laboratory of Photonic and Electronic Bandgap Materials, Ministry of Education, Harbin Normal University, Harbin, 150025, China

\* To whom correspondence should be addressed. Email: xjz\_hmily@163.com (JZ)

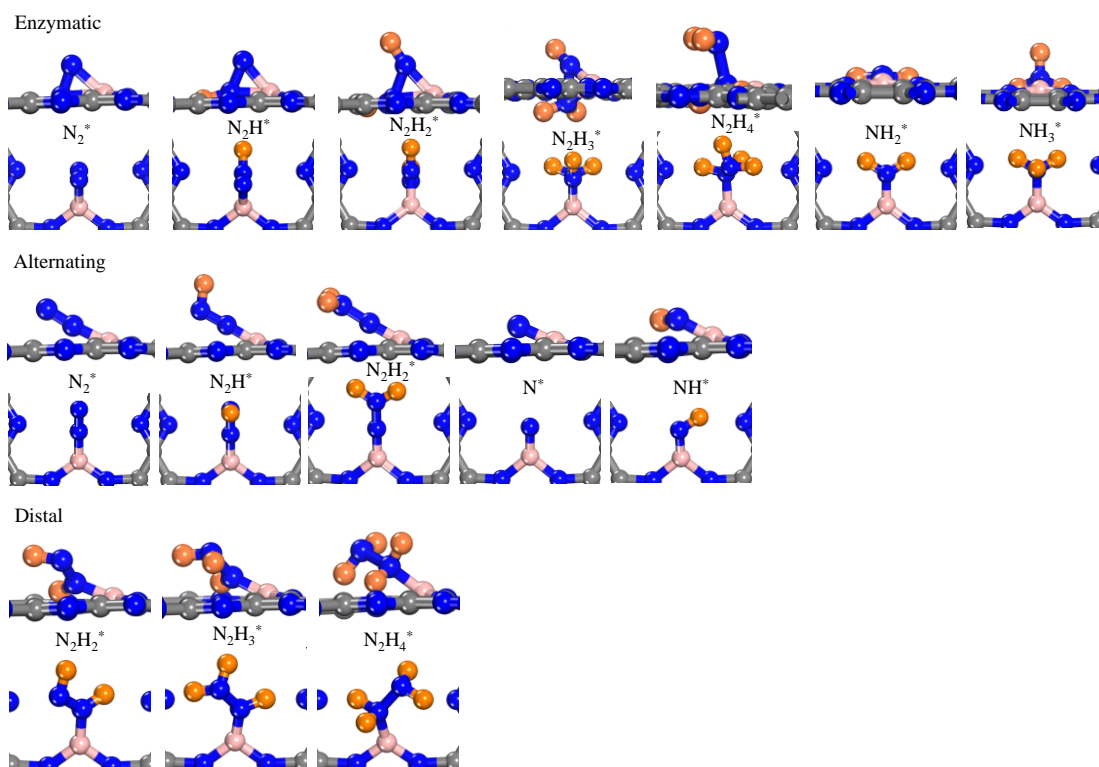

**Figure S1.** The side and top views of the involved NRR intermediates on B<sub>int</sub> surface along the enzymatic, alternating, and distal pathways.

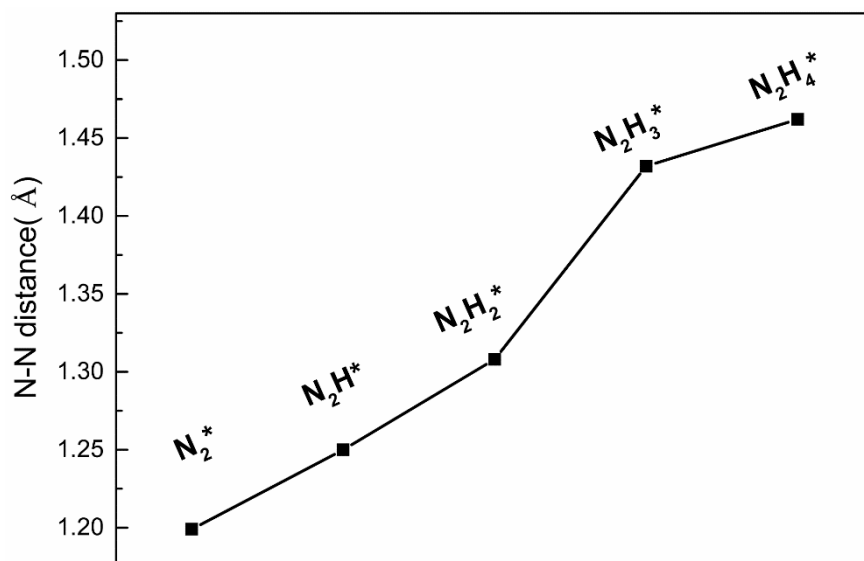

**Figure S2.** The variation of N-N bond lengths of various NRR intermediates on  $B_{int}$  along the enzymatic pathway.

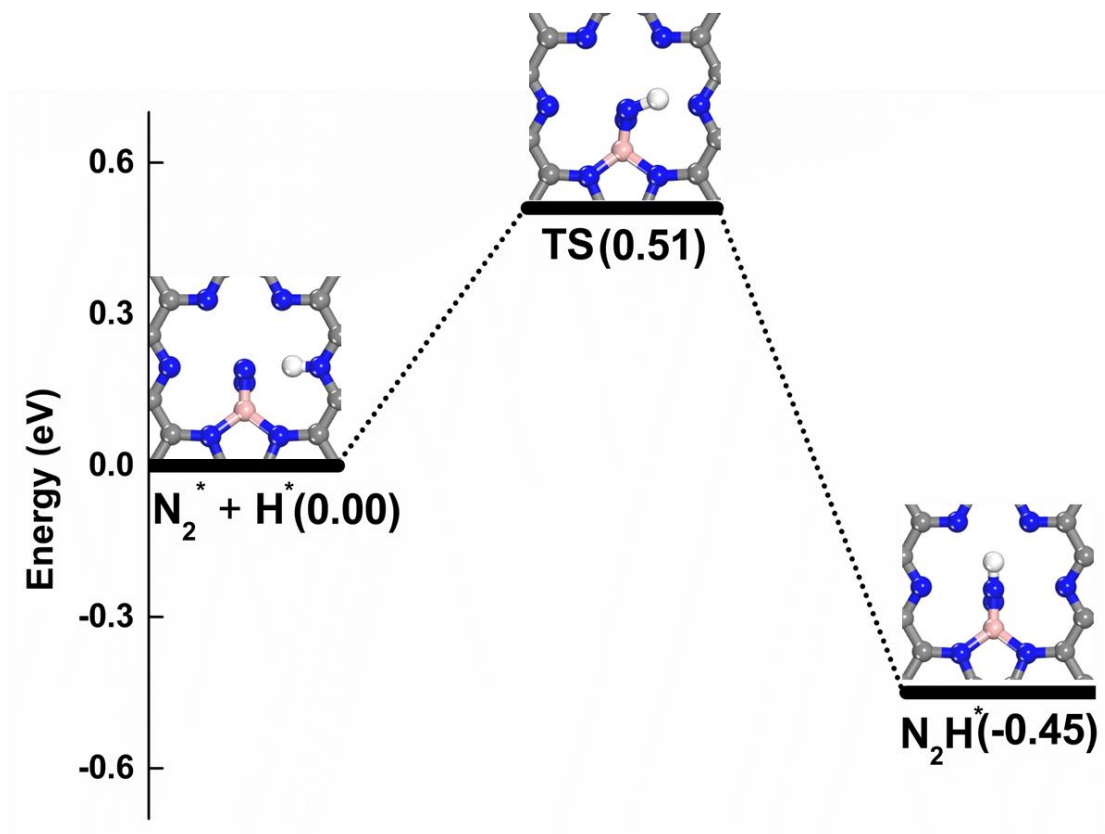

**Figure S3.** The reaction pathway of H-transfer from the N atom around B site to the adsorbed  $N_2$  molecule. TS denotes the transition state.

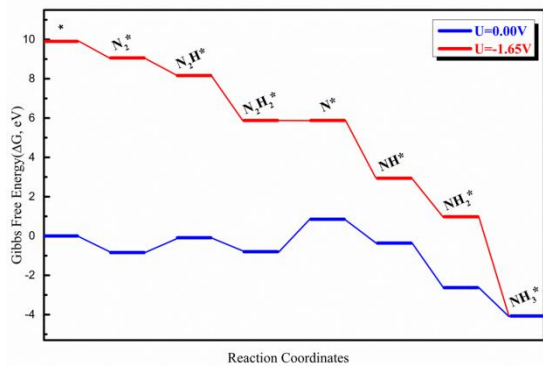

(a)

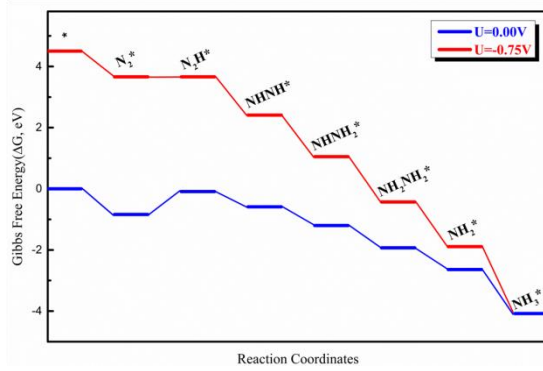

(b)

**Figure S4.** The free energy profiles of NRR on B<sub>N</sub>-doped C<sub>2</sub>N layer along the (a) distal and (b) alternating pathways.

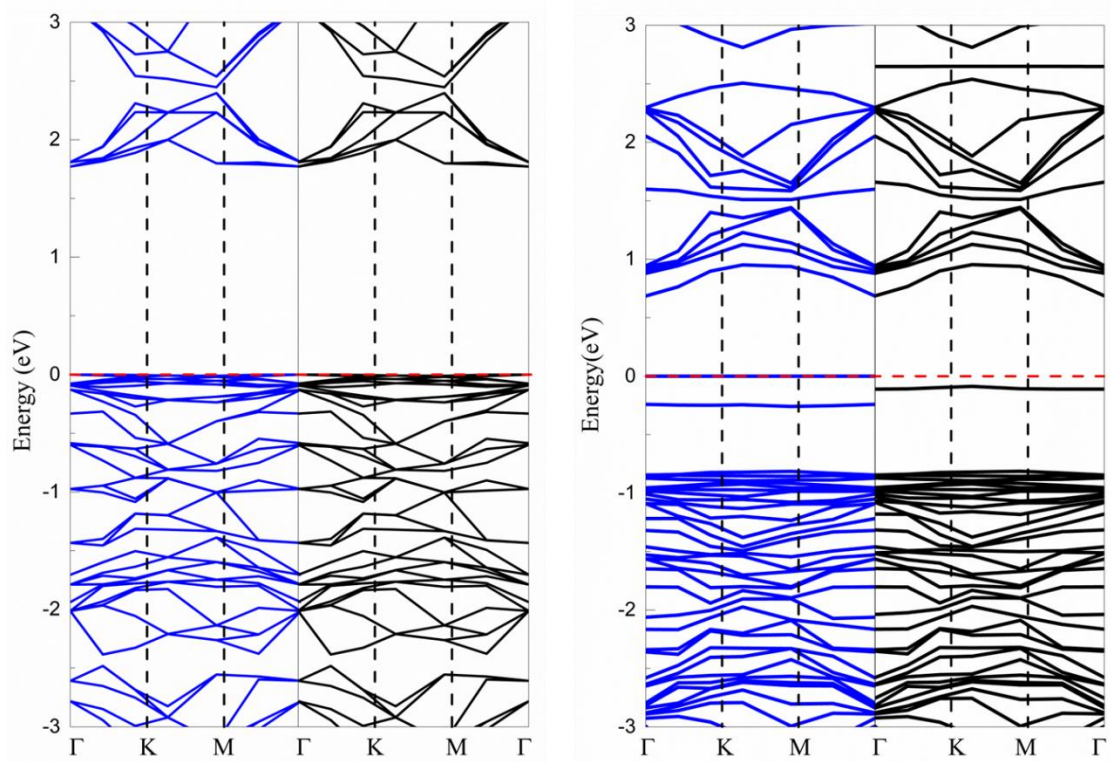

**Figure S5.** The computed band structures of (a) pure and (b)  $B_{int}$ -doped  $C_2N$  layers.

The Fermi level is set as zero in dotted lines.
